# Supplementary material for: Patients, pictures, and privacy: managing clinical photographs in the smartphone era
Source: PubMed Central journal article supplement — Arthroplast Today. 2018 Nov 12;5(1):57–60. doi: 10.1016/j.artd.2018.10.001 (PMC6470317; doi:10.1016/j.artd.2018.10.001), 2018-11-12
Supplement: mmc2.pdf [file mmc2.pdf]

# CONFLICT OF INTEREST STATEMENT

## *American Association of Hip and Knee Surgeons*

(Adopted from the American Academy of Orthopaedic Surgeons disclosure statement)

The following form **must be filled out completely and submitted by each author (example, 6 authors, 6 forms).**  
**All items require a response. If there is no relevant disclosure for a given item, enter "None."**

---

Manuscript Title: **Patients, Pictures and Privacy: Managing Clinical Photographs in the Smartphone Era**

1. Royalties from a company or supplier (The following conflicts were disclosed)  
NO
2. Speakers bureau/paid presentations for a company or supplier (The following conflicts were disclosed)  
NO
- 3A. Paid employee for a company or supplier (The following conflicts were disclosed)  
NO
- 3B. Paid consultant for a company or supplier (The following conflicts were disclosed)  
NO
- 3C. Unpaid consultants for a company or supplier (The following conflicts were disclosed)  
NO
4. Stock or stock options in a company or supplier (The following conflicts were disclosed)  
NO
5. Research support from a company or supplier as a Principal Investigator (The following conflicts were disclosed)  
NO
6. Other financial or material support from a company or supplier (The following conflicts were disclosed)  
NO
7. Royalties, financial or material support from publishers (The following conflicts were disclosed)  
NO
8. Medical/Orthopaedic publications editorial/governing board (The following conflicts were disclosed)  
NO
9. Board member/committee appointments for a society (The following conflicts were disclosed)  
NO

**Each author must sign AND print or type his/her name, date and submit a separate form**

In addition, one BLINDED Conflict of Interest form (no author names used) should be submitted per manuscript with all author disclosures.

B. Sonny Bal MD



September 16, 2018

---

Author Name (Print or Type)

Author Signature

Date
